# Supplementary material for: Photo-switchable supramolecular comb-like polymer brush based on host–guest recognition for use as antimicrobial smart surface
Source: Royal Society of Chemistry journal article supplement (doi:10.1039/d2tb00206j), 2022-01-01
Supplement: d2tb00206j1.pdf [file d2tb00206j1.pdf]

## Support Information

*for*

### **Photo-switchable supramolecular comb-like polymer brush based on host-guest recognition for use as antimicrobial smart surface**

Si Yu Zheng<sup>a,\*</sup>, †, Yifeng Ni<sup>a</sup>, †, Jiahui Zhou<sup>a</sup>, Yucong Gu<sup>a</sup>, Yiting Wang<sup>a</sup>, Jingfeng Yuan<sup>a</sup>, Xiaoyu Wang<sup>a</sup>, Dong Zhang<sup>b,\*</sup>, Shanqiu Liu<sup>a</sup>, Jintao Yang<sup>a,\*</sup>

<sup>a</sup> College of Materials Science & Engineering, Zhejiang University of Technology, Hangzhou 310014, P. R. China.

<sup>b</sup> Department of Chemical, Biomolecular, and Corrosion Engineering, College of Engineering and Polymer Science, The University of Akron, Ohio 44325, United States.

† These authors contributed equally.

Corresponding authors: Emails: [dz39@uakron.edu](mailto:dz39@uakron.edu) (D. Zhang), [zhengsiyu@zjut.edu.cn](mailto:zhengsiyu@zjut.edu.cn) (S. Y. Zheng), [yangjt@zjut.edu.cn](mailto:yangjt@zjut.edu.cn) (J. Yang).

**Table S1.** XPS atomic concentrations of different surfaces.

| Samples | Element content (%) |       |      |      |
|---------|---------------------|-------|------|------|
|         | C                   | O     | S    | N    |
| PHG     | 70.19               | 29.81 | ~0   | ~0   |
| PHGCD   | 66.80               | 30.22 | ~0   | 2.98 |
| PHGAS   | 67.93               | 26.48 | 3.36 | 2.23 |
| PHGASM  | 72.87               | 24.73 | 0.63 | 1.77 |

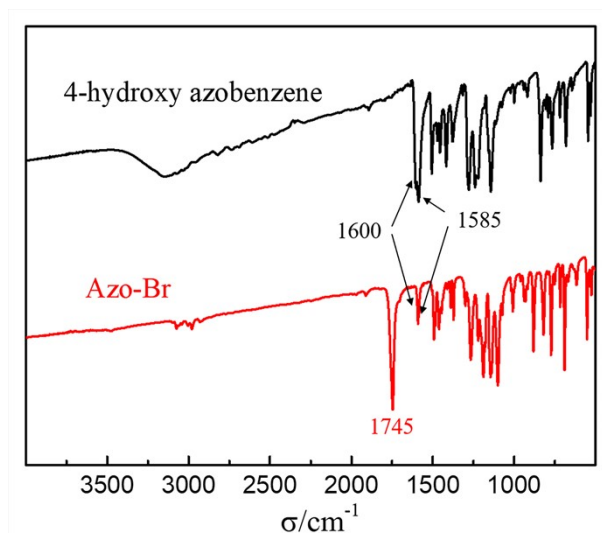

**Fig. S1** The FT-IR spectra comparison of Azo-Br and 4-hydroxy azobenzene.

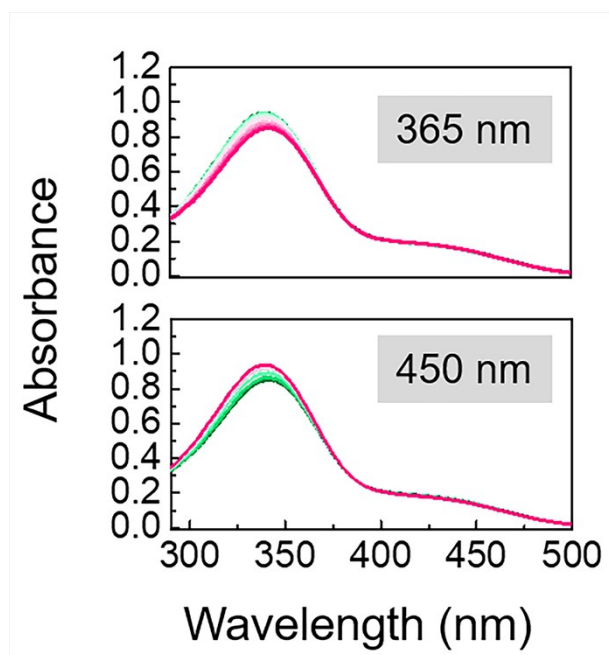

**Fig. S2** UV-vis spectra of Azo-PMETAC under the irradiation of 365 nm UV and 450 nm in H<sub>2</sub>O.

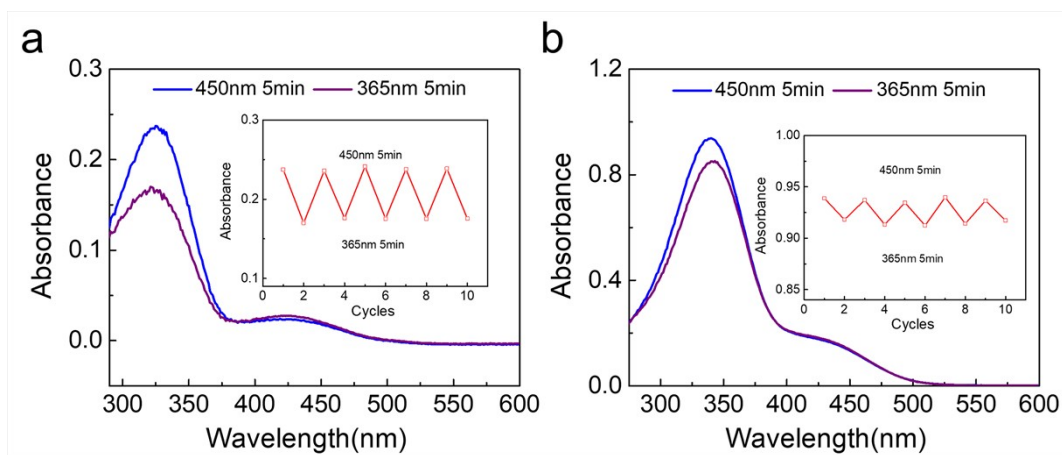

**Fig. S3** Photoresponsive cyclic stability of (a) Azo-PSBMA and (b) Azo-PMETAC solution under 450 nm 5 min and 365 nm 5 min light switching.

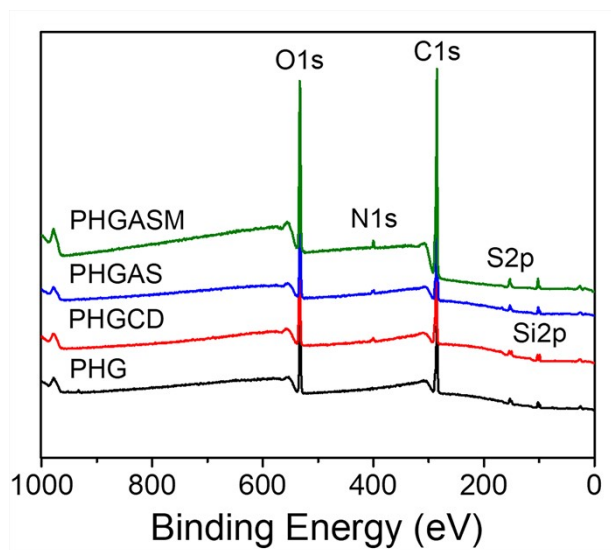

**Fig. S4** XPS spectra of PHG, PHGCD, PHGAS and PHGASM surfaces.

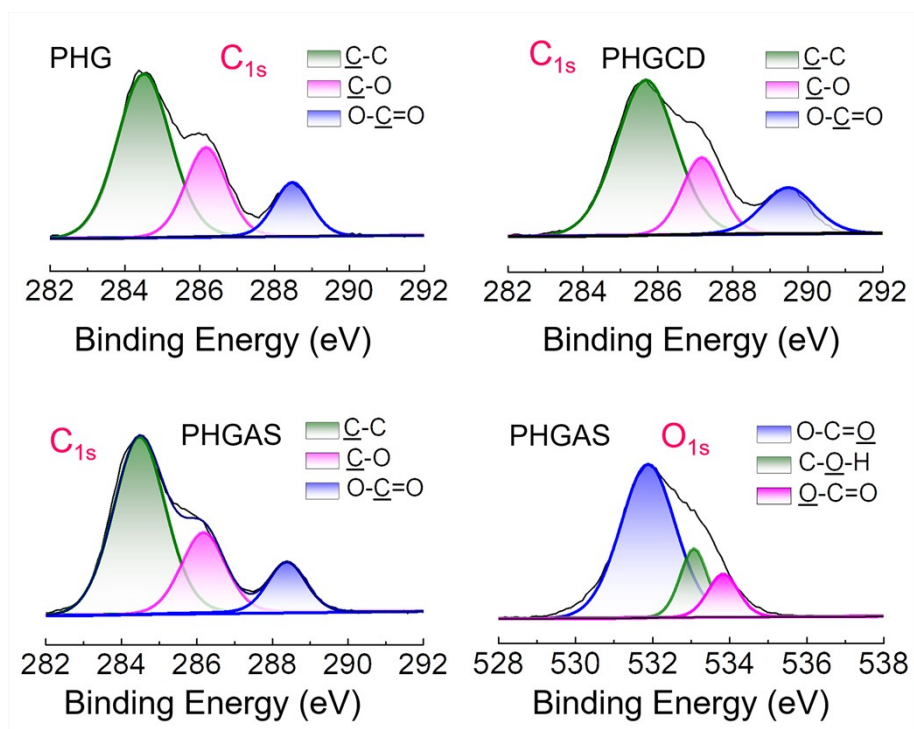

**Fig. S5** XPS spectra comparison for C<sub>1s</sub> and O<sub>1s</sub> high-resolution survey scanning of PHG, PHGCD, PHGAS surfaces.

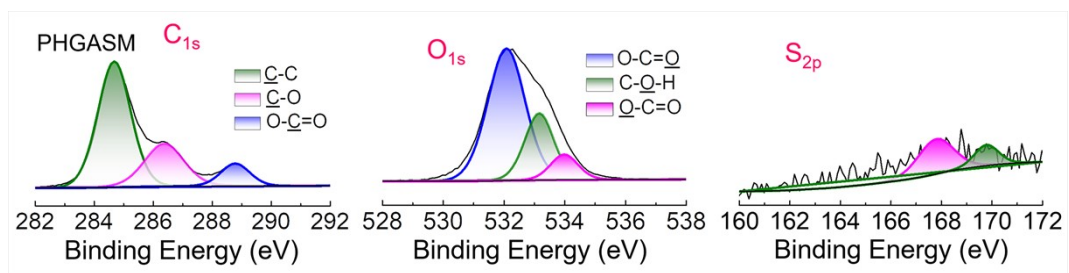

**Fig. S6** XPS spectra comparison for C1s, O1s and S2p high-resolution survey scanning of PHGASM surfaces.



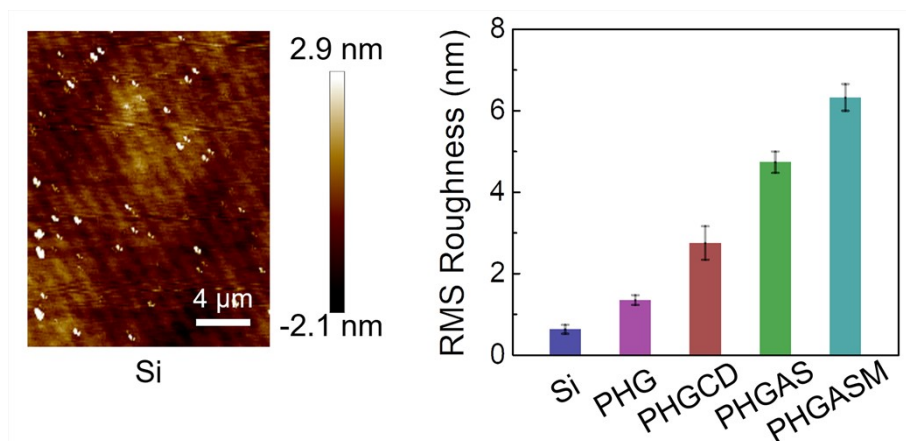

**Fig. S7** Representative AFM images and the corresponding cycle RMS roughness on different surfaces about the Si, PHG, PHGCD, PHGAS and PHGASM surfaces. (Scale bar is 4 μm).

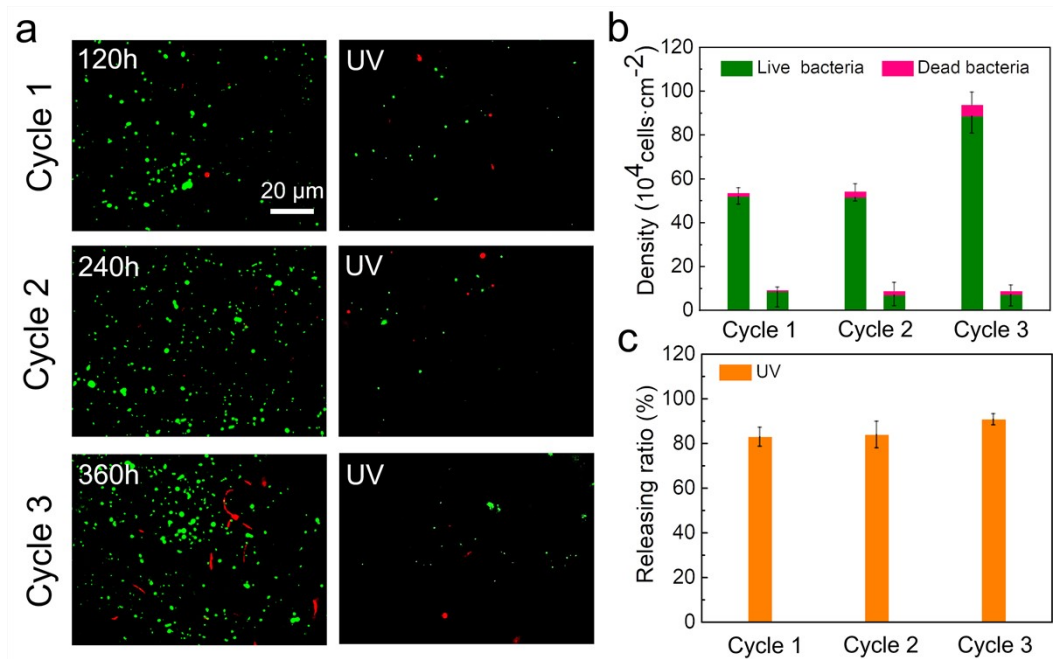

**Fig. S8** Representative fluorescence microscopy and corresponding live/dead cell statistical analysis to show the *E. coli* cyclic releasing properties of Azo-PSBMA/P(HEMA-co-GMA) upon the treatment of 365 nm light irradiation. (Scale bar is 20  $\mu\text{m}$ ).

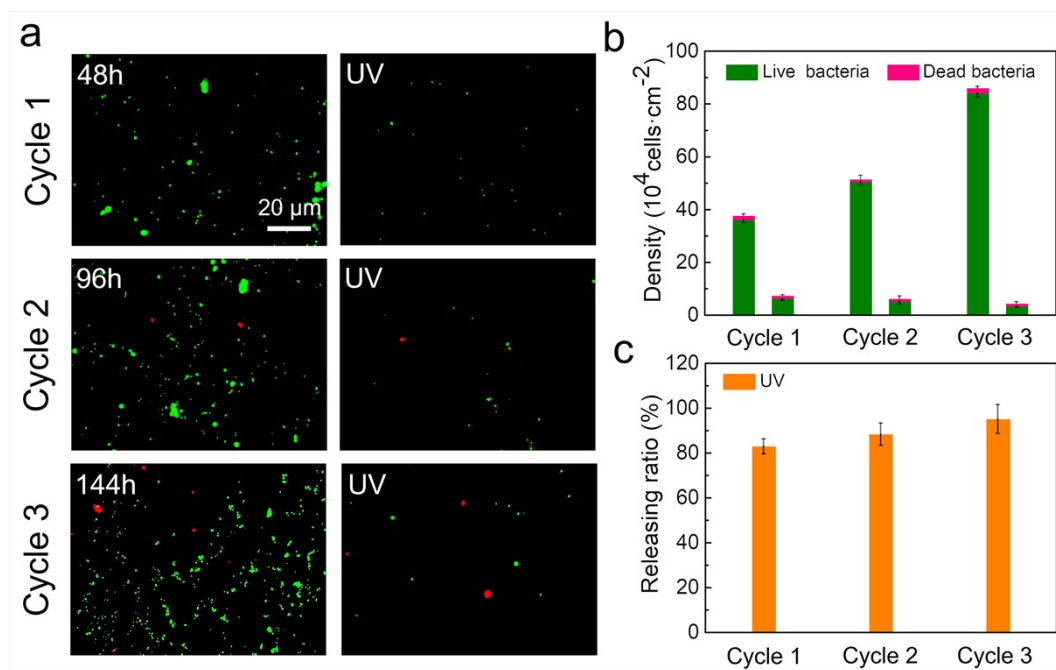

**Fig. S9** Representative fluorescence microscopy and corresponding live/dead cell statistical analysis to show the *S. aureus* cyclic releasing properties of Azo-PSBMA/P(HEMA-co-GMA) upon the treatment of 365 nm light irradiation. (Scale bar is 20  $\mu\text{m}$ ).
